# Supplementary material for: Hybrid assembly of polymeric nanofiber network for robust and electronically conductive hydrogels
Source: PubMed Central journal article supplement (PMC9918487; doi:10.1038/s41467-023-36438-8), 2023-02-10
Supplement: 41467_2023_36438_MOESM3_ESM.pdf [file 41467_2023_36438_MOESM3_ESM.pdf]

### **Description for Additional Supplementary Files**

Supplementary video 1: Calcium transients in cardiomyocytes cultured on TCP and CNH respectively.

Supplementary video 2: Contraction of cardiomyocytes (labelled with CellTracker CM-Dil dye) cultured on TCP, ANF-PVA, and CNH respectively.
